# Supplementary material
Source: publisher figshare collection journal article supplement (https://karger.figshare.com/ndownloader/files/13638641)
Supplement: Supplementary file 1 [file 13638641]

## **Methods**

The institutional review board approved a retrospective chart review of patients with a diagnosis of FFA seen by the principal investigator (M.M.) between January 2015 and December 2017 at the University of Miami Outpatient Dermatology Clinic. Any adult aged 18 or older was included. Variables of interest included demographic data, clinical presentation, comorbidities including other hair disorders, and medications. Electronic medical records were reviewed by 2 independent investigators (J.S.M. and L.J.B.), and all data were entered and stored electronically in REDCap (Research Electronic Data Capture), a web-based application that facilitates the secure creation and management of data collection instruments [18]. For the purpose of analysis, the de-identified data were exported from REDCap into IBM SPSS Statistics for Windows (IBM Corporation, Armonk, NY, USA). Mean and range were calculated for continuous variables. Pearson's  $\chi^2$  test was used to test for independence between categorical variables; however, for expected values less than 5, Fisher's exact test of independence was used instead.
